# Supplementary material
Source: PubMed Central journal article supplement (PMC3353121)
Supplement: NIHMS30178-supplement-1.pdf [file NIHMS30178-supplement-1.pdf]

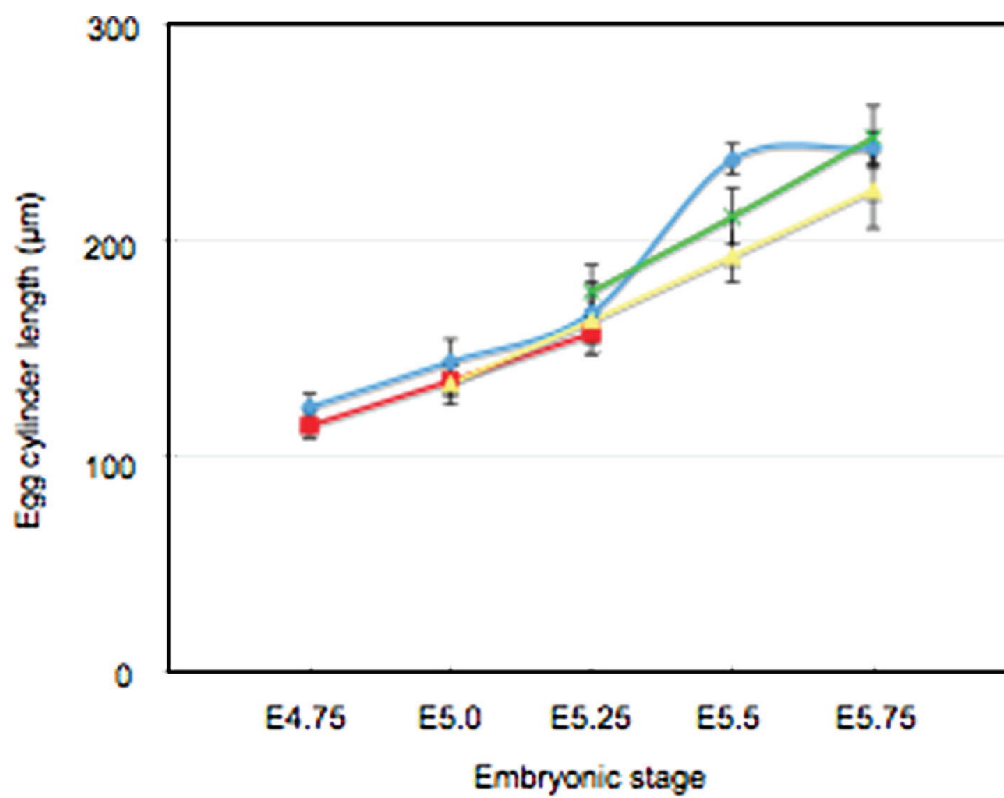

- Freshly collected embryos
- Embryos imaged between E4.75-E5.25
- × Embryos imaged between E5.25-E5.75
- ▲ Embryos imaged between E5.0-E5.75
