# Supplementary material
Source: PubMed Central journal article supplement (PMC3353121)

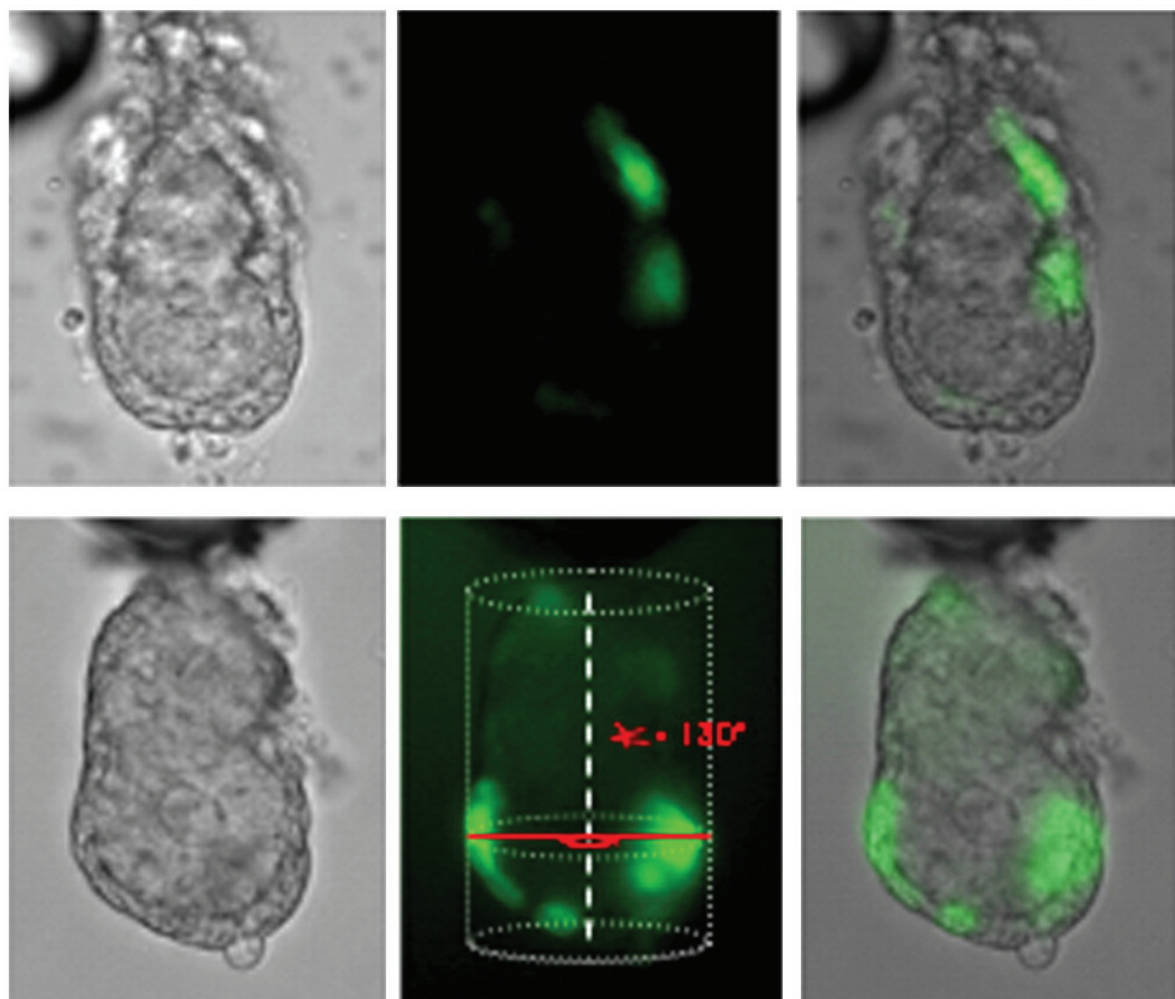

Supplement: NIHMS30178-supplement-2.pdf [file NIHMS30178-supplement-2.pdf]

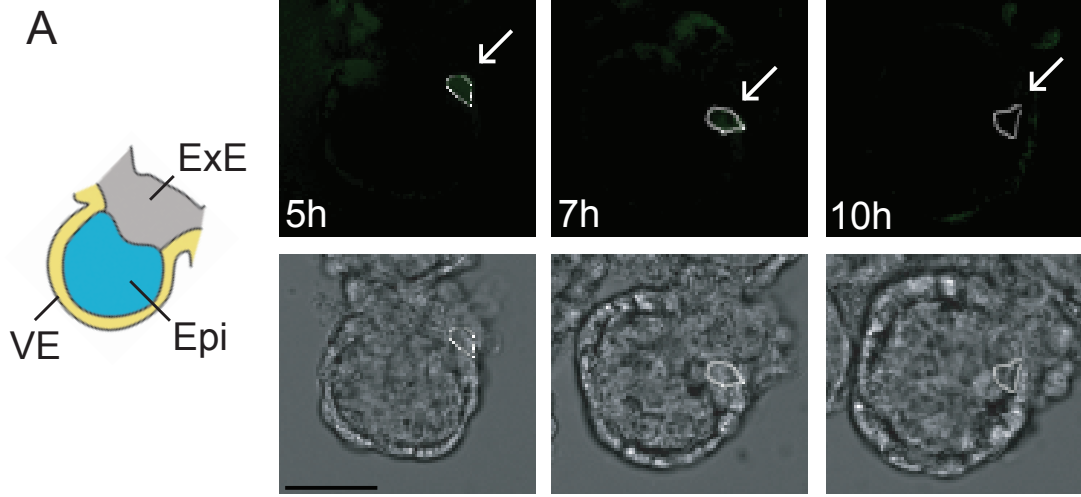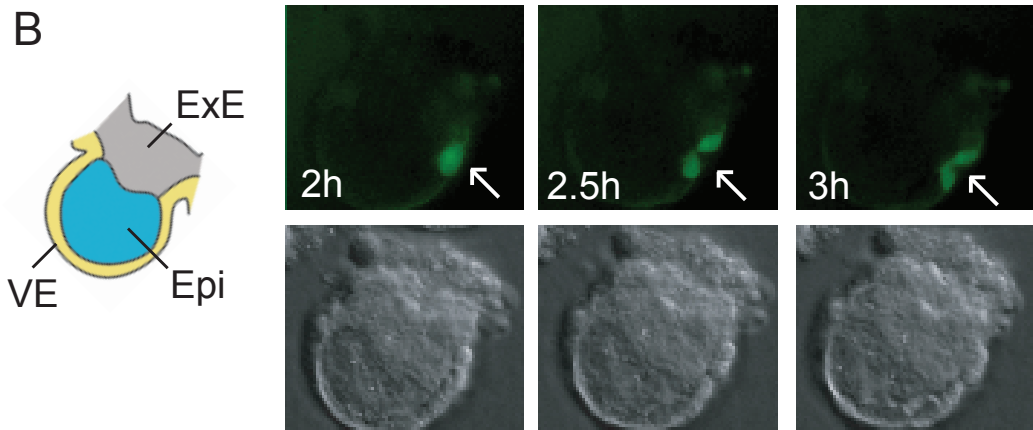

Supplement: NIHMS30178-supplement-3.pdf [file NIHMS30178-supplement-3.pdf]

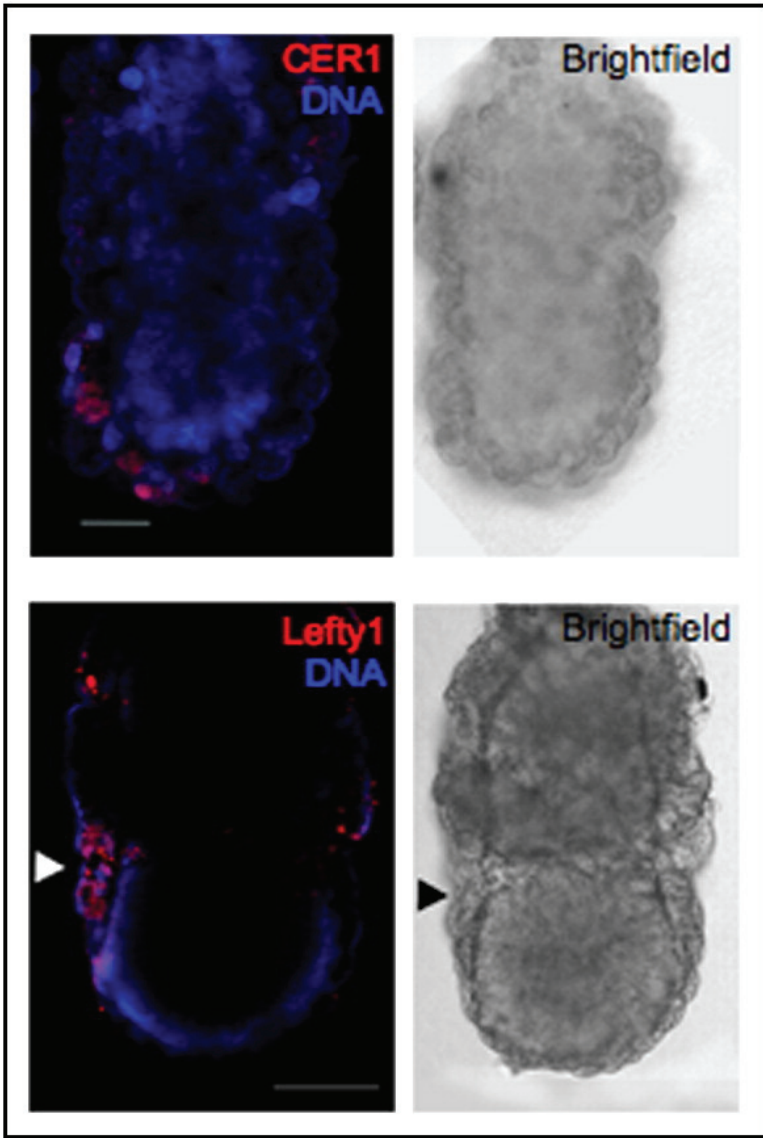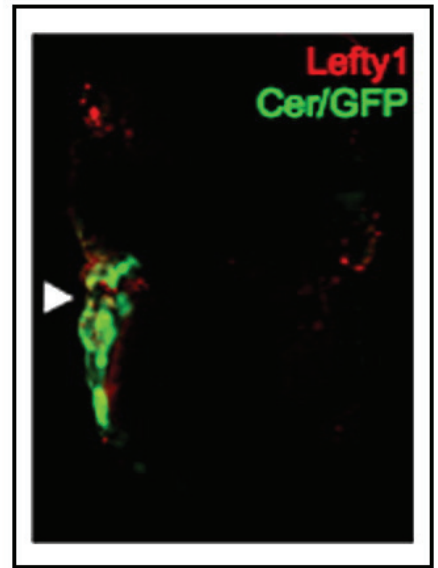

Supplement: NIHMS30178-supplement-4.pdf [file NIHMS30178-supplement-4.pdf]

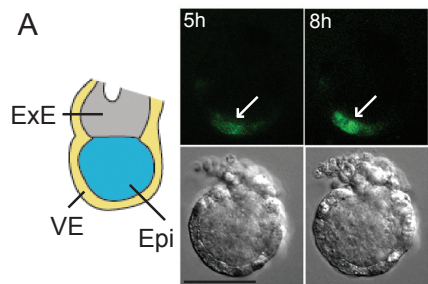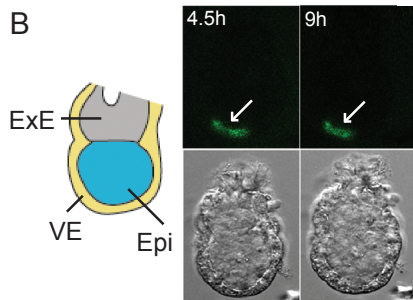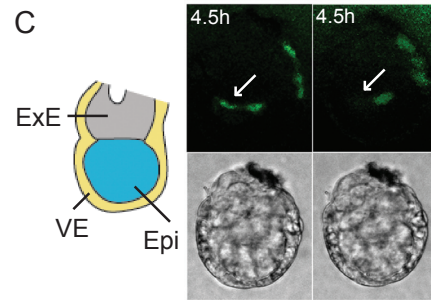

Supplement: NIHMS30178-supplement-5.pdf [file NIHMS30178-supplement-5.pdf]

A

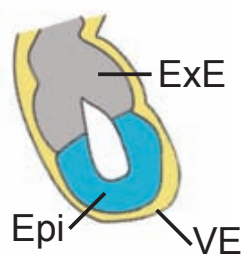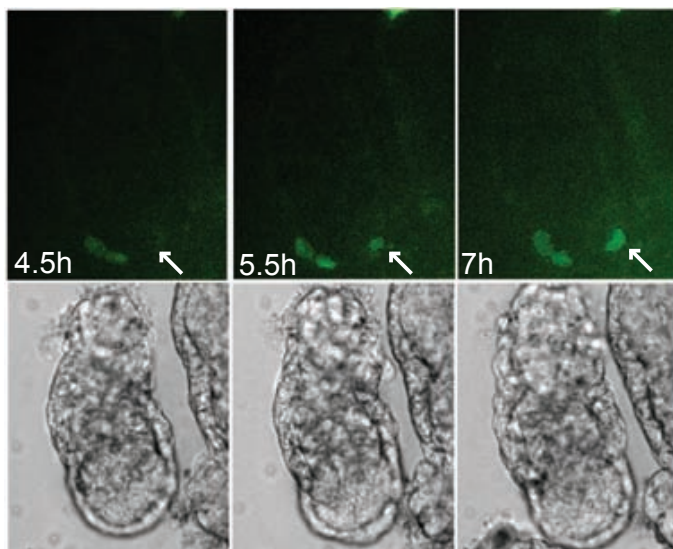

B

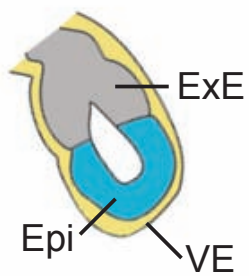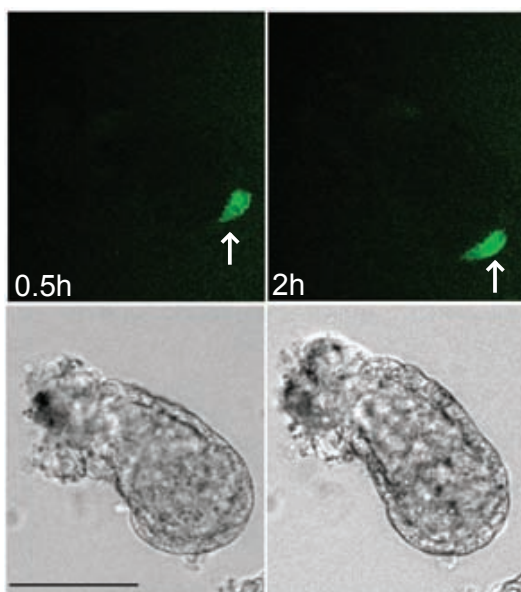

Supplement: NIHMS30178-supplement-6.pdf [file NIHMS30178-supplement-6.pdf]
